# Supplementary material for: Comparison of the 10-year outcomes of cemented and cementless unicompartmental knee replacements: data from the National Joint Registry for England, Wales, Northern Ireland and the Isle of Man
Source: PubMed Central journal article supplement (PMC7006803; doi:10.1080/17453674.2019.1680924), 2019-10-22
Supplement: IORT_A_1680924_SM3038.pdf [file IORT_A_1680924_SM3038.pdf]

## Supplementary data

Table 1. Patient and surgical factors before and after propensity score matching. Values are frequency (%) unless otherwise specified

| Covariate                  | Unmatched cohort       |                               |                                | SMD  | Matched cohort         |                              |                                | SMD     |
|----------------------------|------------------------|-------------------------------|--------------------------------|------|------------------------|------------------------------|--------------------------------|---------|
|                            | All UKRs<br>n = 40,522 | Cemented<br>76%<br>n = 30,814 | Cementless<br>24%<br>n = 9,708 |      | All UKRs<br>n = 14,814 | Cemented<br>50%<br>n = 7,407 | Cementless<br>50%<br>n = 7,407 |         |
| Sex                        |                        |                               |                                |      |                        |                              |                                |         |
| Female                     | 18,775 (46.3)          | 14,707 (47.7)                 | 4,068 (41.9)                   | 0.12 | 6,155 (41.6)           | 3,077 (41.5)                 | 3,078 (41.6)                   | < 0.001 |
| Male                       | 21,747 (53.7)          | 16,107 (52.3)                 | 5,640 (58.1)                   |      | 8,659 (58.4)           | 4,330 (58.5)                 | 4,329 (58.4)                   |         |
| Age at surgery             |                        |                               |                                |      |                        |                              |                                |         |
| Mean (SD)                  | 64.7 (9.5)             | 64.7 (9.5)                    | 64.8 (9.5)                     | 0.01 | 64.7 (9.5)             | 64.6 (9.6)                   | 64.7 (9.5)                     | 0.003   |
| BMI (cases)                | 26,966                 | 18,669                        | 8,297                          |      | 11,801                 | 5,565                        | 6,236                          |         |
| Mean (SD)                  | 30.2 (5.0)             | 30.2 (5.0)                    | 30.4 (5.2)                     | 0.04 | 30.3 (5.0)             | 30.2 (4.9)                   | 30.4 (5.2)                     | 0.05    |
| Primary diagnosis          |                        |                               |                                |      |                        |                              |                                |         |
| Primary OA                 | 40,059 (98.9)          | 30,474 (98.9)                 | 9,585 (98.7)                   | 0.02 | 14,633 (98.8)          | 7,314 (98.7)                 | 7,319 (98.8)                   | 0.006   |
| Other                      | 463 (1.1)              | 340 (1.1)                     | 123 (1.3)                      |      | 181 (1.2)              | 93 (1.3)                     | 88 (1.2)                       |         |
| Bilateral UKRs             | 1,325 (3.3)            | 874 (2.8)                     | 451 (4.6)                      | 0.1  | 493 (3.3)              | 245 (3.3)                    | 248 (3.4)                      | 0.002   |
| ASA grade                  |                        |                               |                                |      |                        |                              |                                |         |
| 1                          | 8,441 (20.8)           | 6,321 (20.5)                  | 2,120 (21.8)                   | 0.05 | 3,025 (20.4)           | 1,536 (20.7)                 | 1,489 (20.1)                   | 0.02    |
| 2                          | 28,687 (70.8)          | 21,983 (71.3)                 | 6,704 (69.1)                   |      | 10,499 (70.9)          | 5,227 (70.6)                 | 5,272 (71.2)                   |         |
| 3 or above                 | 3,394 (8.4)            | 2,510 (8.1)                   | 884 (9.1)                      |      | 1,290 (8.7)            | 644 (8.7)                    | 646 (8.7)                      |         |
| VTE—chemical               |                        |                               |                                |      |                        |                              |                                |         |
| LMWH (± other)             | 23,789 (58.7)          | 17,561 (57.0)                 | 6,228 (64.2)                   | 0.40 | 9,311 (62.9)           | 4,624 (62.4)                 | 4,687 (63.3)                   | 0.02    |
| Aspirin only               | 5,158 (12.7)           | 4,152 (13.5)                  | 1,006 (10.4)                   |      | 1,446 (9.8)            | 727 (9.8)                    | 719 (9.7)                      |         |
| Other                      | 7,747 (19.1)           | 5,496 (17.8)                  | 2,251 (23.2)                   |      | 3,641 (24.6)           | 1,851 (25.0)                 | 1,790 (24.2)                   |         |
| None                       | 3,828 (9.5)            | 3,605 (11.7)                  | 223 (2.3)                      |      | 416 (2.8)              | 205 (2.8)                    | 211 (2.8)                      |         |
| VTE—mechanical             |                        |                               |                                |      |                        |                              |                                |         |
| Any                        | 38,947 (96.1)          | 29,316 (95.1)                 | 9,631 (99.2)                   | 0.25 | 14,662 (99.0)          | 7,332 (99.0)                 | 7,330 (99.0)                   | 0.003   |
| None                       | 1,575 (3.9)            | 1,498 (4.9)                   | 77 (0.8)                       |      | 152 (1.0)              | 75 (1.0)                     | 77 (1.0)                       |         |
| Year of surgery            |                        |                               |                                |      |                        |                              |                                |         |
| 2005                       | 1,108 (2.7)            | 1,100 (3.6)                   | 8 (0.1)                        | 1.32 | 17 (0.1)               | 9 (0.1)                      | 8 (0.1)                        | 0.18    |
| 2006                       | 1,929 (4.8)            | 1,889 (6.1)                   | 40 (0.4)                       |      | 78 (0.5)               | 38 (0.5)                     | 40 (0.5)                       |         |
| 2007                       | 2,730 (6.7)            | 2,702 (8.8)                   | 28 (0.3)                       |      | 89 (0.6)               | 61 (0.8)                     | 28 (0.4)                       |         |
| 2008                       | 3,426 (8.5)            | 3,344 (10.9)                  | 82 (0.8)                       |      | 229 (1.6)              | 147 (2.0)                    | 82 (1.1)                       |         |
| 2009                       | 3,721 (9.2)            | 3,460 (11.2)                  | 261 (2.7)                      |      | 499 (3.4)              | 238 (3.2)                    | 261 (3.5)                      |         |
| 2010                       | 3,660 (9.0)            | 3,256 (10.6)                  | 404 (4.2)                      |      | 752 (5.1)              | 349 (4.7)                    | 403 (5.4)                      |         |
| 2011                       | 3,652 (9.0)            | 3,013 (9.8)                   | 639 (6.6)                      |      | 1,054 (7.1)            | 417 (5.6)                    | 637 (8.6)                      |         |
| 2012                       | 3,680 (9.1)            | 2,962 (9.6)                   | 718 (7.4)                      |      | 1,400 (9.5)            | 695 (9.4)                    | 705 (9.5)                      |         |
| 2013                       | 3,582 (8.8)            | 2,622 (8.5)                   | 960 (9.9)                      |      | 1,860 (12.6)           | 996 (13.4)                   | 864 (11.7)                     |         |
| 2014                       | 4,182 (10.3)           | 2,637 (8.6)                   | 1,545 (15.9)                   |      | 2,762 (18.6)           | 1,500 (20.3)                 | 1,262 (17.0)                   |         |
| 2015                       | 4,303 (10.6)           | 2,112 (6.9)                   | 2,191 (22.6)                   |      | 3,083 (20.8)           | 1,528 (20.6)                 | 1,555 (21.0)                   |         |
| 2016                       | 4,549 (11.2)           | 1,717 (5.6)                   | 2,832 (29.2)                   |      | 2,991 (20.2)           | 1,429 (19.3)                 | 1,562 (21.1)                   |         |
| Surgeon grade              |                        |                               |                                |      |                        |                              |                                |         |
| Consultant                 | 36,346 (89.7)          | 27,775 (90.1)                 | 8,571 (88.3)                   | 0.06 | 13,310 (89.8)          | 6,688 (90.3)                 | 6,622 (89.4)                   | 0.03    |
| Other                      | 4,176 (10.3)           | 3,039 (9.9)                   | 1,137 (11.7)                   |      | 1,504 (10.2)           | 719 (9.7)                    | 785 (10.6)                     |         |
| Surgeon caseload/year      |                        |                               |                                |      |                        |                              |                                |         |
| < 10                       | 16,130 (39.8)          | 13,474 (43.7)                 | 2,656 (27.4)                   | 0.43 | 4,691 (31.7)           | 2,327 (31.4)                 | 2,364 (31.9)                   | 0.01    |
| 10 to < 30                 | 16,785 (41.4)          | 12,685 (41.2)                 | 4,100 (42.2)                   |      | 6,664 (45.0)           | 3,336 (45.0)                 | 3,328 (44.9)                   |         |
| ≥ 30                       | 7,607 (18.8)           | 4,655 (15.1)                  | 2,952 (30.4)                   |      | 3,459 (23.4)           | 1,744 (23.5)                 | 1,715 (23.2)                   |         |
| Surgical approach          |                        |                               |                                |      |                        |                              |                                |         |
| Medial parapatellar        | 37,052 (91.4)          | 28,154 (91.4)                 | 8,898 (91.7)                   | 0.01 | 13,649 (92.1)          | 6,827 (92.2)                 | 6,822 (92.1)                   | 0.003   |
| Other                      | 3,470 (8.6)            | 2,660 (8.6)                   | 810 (8.3)                      |      | 1,165 (7.9)            | 580 (7.8)                    | 585 (7.9)                      |         |
| Minimally invasive surgery |                        |                               |                                |      |                        |                              |                                |         |
| No                         | 21,076 (52.0)          | 16,287 (52.9)                 | 4,789 (49.3)                   | 0.07 | 7,600 (51.3)           | 3,796 (51.3)                 | 3,804 (51.4)                   | 0.002   |
| Yes                        | 19,446 (48.0)          | 14,527 (47.1)                 | 4,919 (50.7)                   |      | 7,214 (48.7)           | 3,611 (48.8)                 | 3,603 (48.6)                   |         |
| Femoral component size     |                        |                               |                                |      |                        |                              |                                |         |
| Extra small                | 89 (0.2)               | 47 (0.2)                      | 42 (0.4)                       | 0.14 | 47 (0.3)               | 26 (0.4)                     | 21 (0.3)                       | 0.02    |
| Small                      | 9,408 (23.2)           | 6,904 (22.4)                  | 2,504 (25.8)                   |      | 3,479 (23.5)           | 1,752 (23.7)                 | 1,727 (23.3)                   |         |
| Medium                     | 21,214 (52.4)          | 16,608 (53.9)                 | 4,606 (47.4)                   |      | 7,280 (49.1)           | 3,617 (48.8)                 | 3,663 (49.5)                   |         |
| Large                      | 9,700 (23.9)           | 7,171 (23.3)                  | 2,529 (26.1)                   |      | 3,970 (26.8)           | 1,990 (26.9)                 | 1,980 (26.7)                   |         |
| Extra large                | 111 (0.3)              | 84 (0.3)                      | 27 (0.3)                       |      | 38 (0.3)               | 22 (0.3)                     | 16 (0.2)                       |         |

Table 1. Continued.

| Covariate             | Unmatched cohort       |                               |                                | SMD       | Matched cohort         |                              |                                | SMD   |
|-----------------------|------------------------|-------------------------------|--------------------------------|-----------|------------------------|------------------------------|--------------------------------|-------|
|                       | All UKRs<br>n = 40,522 | Cemented<br>76%<br>n = 30,814 | Cementless<br>24%<br>n = 9,708 |           | All UKRs<br>n = 14,814 | Cemented<br>50%<br>n = 7,407 | Cementless<br>50%<br>n = 7,407 |       |
| Tibial component size |                        |                               |                                |           |                        |                              |                                |       |
| AA                    | 130 (0.3)              | 93 (0.3)                      | 37 (0.4)                       | 0.37      | 58 (0.4)               | 29 (0.4)                     | 29 (0.4)                       | 0.01  |
| A                     | 3,805 (9.4)            | 3,453 (11.2)                  | 352 (3.6)                      |           | 679 (4.6)              | 336 (4.5)                    | 343 (4.6)                      |       |
| B                     | 9,158 (22.6)           | 7,288 (23.7)                  | 1,870 (19.3)                   |           | 2,994 (20.2)           | 1,513 (20.4)                 | 1,481 (20.0)                   |       |
| C                     | 11,576 (28.6)          | 8,769 (28.5)                  | 2,807 (28.9)                   |           | 4,284 (28.9)           | 2,137 (28.9)                 | 2,147 (29.0)                   |       |
| D                     | 9,668 (23.9)           | 7,098 (23.0)                  | 2,570 (26.5)                   |           | 3,965 (26.8)           | 1,974 (26.7)                 | 1,991 (26.9)                   |       |
| E                     | 4,753 (11.7)           | 3,216 (10.4)                  | 1,537 (15.8)                   |           | 2,179 (14.7)           | 1,095 (14.8)                 | 1,084 (14.6)                   |       |
| F                     | 1,432 (3.5)            | 897 (2.9)                     | 535 (5.5)                      | 655 (4.4) | 323 (4.4)              | 332 (4.5)                    |                                |       |
| Bearing type          |                        |                               |                                |           |                        |                              |                                |       |
| Anatomic              | 32,708 (80.7)          | 23,301 (75.6)                 | 9,407 (96.9)                   | 0.65      | 14,198 (95.8)          | 7,092 (95.8)                 | 7,106 (95.9)                   | 0.009 |
| Symmetric             | 7,814 (19.3)           | 7,513 (24.4)                  | 301 (3.1)                      |           | 616 (4.2)              | 315 (4.3)                    | 301 (4.1)                      |       |
| Bearing size          |                        |                               |                                |           |                        |                              |                                |       |
| 3                     | 9,269 (22.9)           | 6,226 (20.3)                  | 3,003 (30.9)                   | 0.37      | 4,056 (27.4)           | 2,056 (27.8)                 | 2,000 (27.0)                   | 0.02  |
| 4                     | 16,219 (40.0)          | 12,126 (39.4)                 | 4,093 (42.2)                   |           | 6,288 (42.5)           | 3,128 (42.2)                 | 3,160 (42.7)                   |       |
| 5                     | 8,552 (21.1)           | 6,765 (22.0)                  | 1,787 (18.4)                   |           | 2,942 (19.9)           | 1,459 (19.7)                 | 1,483 (20.0)                   |       |
| 6                     | 3,846 (9.5)            | 3,268 (10.6)                  | 578 (6.0)                      |           | 1,042 (7.0)            | 519 (7.0)                    | 523 (7.1)                      |       |
| 7                     | 1,667 (4.1)            | 1,506 (4.9)                   | 161 (1.7)                      |           | 306 (2.1)              | 150 (2.0)                    | 156 (2.1)                      |       |
| 8                     | 620 (1.5)              | 563 (1.8)                     | 57 (0.6)                       |           | 118 (0.8)              | 62 (0.8)                     | 56 (0.8)                       |       |
| 9                     | 349 (0.9)              | 320 (1.0)                     | 29 (0.3)                       | 62 (0.4)  | 33 (0.4)               | 29 (0.4)                     |                                |       |
| Bone graft            |                        |                               |                                |           |                        |                              |                                |       |
| No                    | 40,374 (99.6)          | 30,745 (99.8)                 | 9,629 (99.2)                   | 0.08      | 14,758 (99.6)          | 7,377 (99.6)                 | 7,381 (99.7)                   | 0.009 |
| Yes                   | 148 (0.4)              | 69 (0.2)                      | 79 (0.8)                       |           | 56 (0.4)               | 30 (0.4)                     | 26 (0.4)                       |       |

Abbreviations: ASA = American Society of Anesthesiologists score, BMI = body mass index, OA = osteoarthritis, SD = standard deviation, SMD = standardized mean difference, UKR = unicompartmental knee replacement, VTE = venous thromboembolism.

Table 2. Reasons for revision in the matched cohort

| Revision indication                  | All UKRs<br>(n = 14,814)<br>n (%) | Cemented UKRs<br>(n = 7,407)<br>n (%) | Time to revision<br>indication<br>mean (SD) | Cementless UKRs<br>(n = 7,407)<br>n (%) | Time to revision<br>indication<br>mean (SD) | p-value <sup>a</sup> |
|--------------------------------------|-----------------------------------|---------------------------------------|---------------------------------------------|-----------------------------------------|---------------------------------------------|----------------------|
| Aseptic loosening <sup>b</sup>       | 105 (0.71)                        | 74 (1.00)                             | 1.5 (2.1)                                   | 31 (0.42)                               | 2.0 (2.0)                                   | < 0.001              |
| OA progression                       | 127 (0.86)                        | 72 (0.97)                             | 3.5 (2.5)                                   | 55 (0.74)                               | 3.7 (2.0)                                   | 0.1                  |
| Pain <sup>b</sup>                    | 89 (0.60)                         | 55 (0.74)                             | 2.8 (2.1)                                   | 34 (0.46)                               | 2.0 (1.5)                                   | 0.03                 |
| Other                                | 70 (0.47)                         | 41 (0.55)                             | 2.5 (2.0)                                   | 29 (0.39)                               | 2.0 (1.3)                                   | 0.2                  |
| Dislocation/subluxation              | 49 (0.33)                         | 28 (0.38)                             | 1.6 (1.6)                                   | 21 (0.28)                               | 1.2 (1.2)                                   | 0.4                  |
| Instability                          | 33 (0.22)                         | 13 (0.18)                             | 2.9 (1.3)                                   | 20 (0.27)                               | 1.9 (1.9)                                   | 0.3                  |
| Component dissociation               | 29 (0.20)                         | 13 (0.18)                             | 1.4 (1.1)                                   | 16 (0.22)                               | 2.2 (2.1)                                   | 0.6                  |
| Malalignment                         | 37 (0.25)                         | 13 (0.18)                             | 1.2 (0.9)                                   | 24 (0.32)                               | 1.8 (1.4)                                   | 0.1                  |
| Infection                            | 28 (0.19)                         | 15 (0.20)                             | 1.9 (2.1)                                   | 13 (0.18)                               | 1.8 (1.8)                                   | 0.8                  |
| Periprosthetic fracture <sup>b</sup> | 26 (0.18)                         | 7 (0.09)                              | 1.0 (0.9)                                   | 19 (0.26)                               | 1.0 (2.4)                                   | 0.01                 |
| Lysis <sup>b</sup>                   | 14 (0.09)                         | 11 (0.15)                             | 2.5 (1.4)                                   | 3 (0.04)                                | 1.6 (1.0)                                   | 0.03                 |
| Wear                                 | 14 (0.09)                         | 7 (0.09)                              | 4.0 (2.8)                                   | 7 (0.09)                                | 3.5 (2.9)                                   | 1.0                  |
| Stiffness                            | 12 (0.08)                         | 5 (0.07)                              | 1.6 (0.6)                                   | 7 (0.09)                                | 1.4 (1.0)                                   | 0.7                  |
| Implant fracture                     | 1 (0)                             | 1 (0.01)                              | 2.0                                         | 0 (0)                                   | N/A                                         | No revisions         |
| Patellar wear                        | 0 (0)                             | 0 (0)                                 | N/A                                         | 0 (0)                                   | N/A                                         | No revisions         |
| Tibial wear                          | 0 (0)                             | 0 (0)                                 | N/A                                         | 0 (0)                                   | N/A                                         | No revisions         |
| Incorrect sizing                     | 0 (0)                             | 0 (0)                                 | N/A                                         | 0 (0)                                   | N/A                                         | No revisions         |
| Patellar mal tracking                | 0 (0)                             | 0 (0)                                 | N/A                                         | 0 (0)                                   | N/A                                         | No revisions         |

<sup>a</sup> Comparisons between the frequency of revision indications were conducted using the chi-square test.

<sup>b</sup> Refers to revision indications that were statistically significantly different between cementless and cemented implants.

Abbreviations: OA = osteoarthritis, UKR = unicompartmental knee replacement.
